# Supplementary material
Source: Springer Nature journal article supplement (https://www.springermedizin.de/resource/supplementary/12889_2008_1264_MOESM3_ESM.pdf/9502818)
Supplement: MOESM3 [file 9502818]

| <b>Valued changes</b>             | <b>Description</b>                                                                                                                                                                |
|-----------------------------------|-----------------------------------------------------------------------------------------------------------------------------------------------------------------------------------|
| <b>Intra-personal sphere</b>      |                                                                                                                                                                                   |
| <b>Personal transformation</b>    | A personal journey from a negative to a more positive state of being, primarily characterised by increased confidence, realising personal potentials and learning to manage anger |
| <b>Future orientation</b>         | The development of personal goals and aspirations and the creation of hope for the future                                                                                         |
| <b>Mental and physical health</b> | Increased awareness of the interdependent relationship between physical and mental health and well-being                                                                          |
| <b>Group sphere</b>               |                                                                                                                                                                                   |
| <b>Social connection</b>          | Bringing socially isolated women together so that they can develop a sense of belonging to each other and the wider community                                                     |
| <b>Group support</b>              | The creation of a space where the women are able to share their problems with others in a similar situation and explore solutions                                                 |
| <b>Familial sphere</b>            |                                                                                                                                                                                   |
| <b>Family relationships</b>       | Improved relationships with parents, in-laws and children                                                                                                                         |
| <b>Broader community sphere</b>   |                                                                                                                                                                                   |
| <b>Economic participation</b>     | The allowance coupled with the power of the group created the opportunity for engaging in income generation activities                                                            |
| <b>Stigma and discrimination</b>  | Being able to better manage and respond to felt and enacted stigma and discrimination                                                                                             |
| <b>Reaching out</b>               | The awakening of a desire to help others in a similar situation and the potential for the group to engage in advocacy on behalf of others.                                        |
